# Supplementary material for: circBANP promotes colorectal cancer growth and metastasis via sponging let-7d-5p to modulate HMGA1/Wnt/β-catenin signaling
Source: PubMed Central journal article supplement — Mol Ther Oncolytics. 2021 Mar 23;21:119–33. doi: 10.1016/j.omto.2021.03.012 (PMC8079336; doi:10.1016/j.omto.2021.03.012), 2021-03-23
Supplement: mmc1.pdf [file mmc1.pdf]

OMTO, Volume 21

## **Supplemental information**

**circBANP promotes colorectal cancer growth  
and metastasis via sponging let-7d-5p  
to modulate HMGA1/Wnt/ $\beta$ -catenin signaling**

**Yijiang Ni, Chen Lu, Wulin Wang, Wenjie Gao, and Chunzhao Yu**

## Supplemental Methods

### Cell counting kit-8 (CCK-8) assay

After transfection for 48 h, CRC cells ( $1 \times 10^3$ ) were plated into 96-well plates and 10  $\mu$ L CCK-8 solution (Dojindo Laboratories, Japan) was added into each well for 2 h incubation at 37°C. Then, absorbance at 450 nm was measured with a microtiter plate reader.

### Supplemental Figures

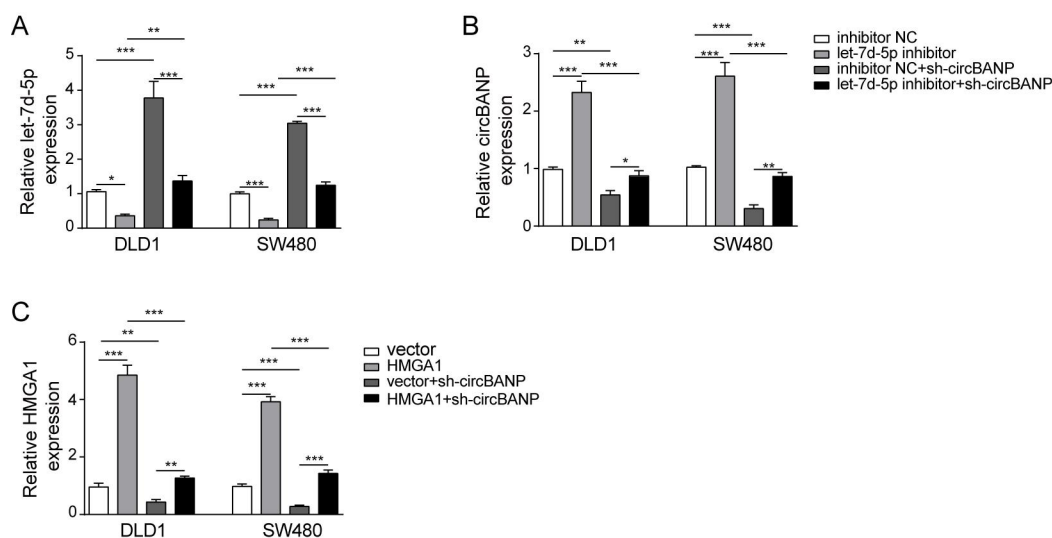

**Figure S1. The expression of circBANP, let-7d-5p and HMGA1 in CRC with indicated transfection.** (A) The expression of let-7d-5p was detected in cells transfected with let-7d-5p inhibitor and/or sh-circBANP. (B) Relative level of circBANP was measured in cells transfected with let-7d-5p inhibitor and/or sh-circBANP. (C) qRT-PCR analysis of HMGA1 in cells transfected with HMGA1 and/or sh-circBANP. Data were presented as means  $\pm$  SD. \* $p < 0.05$ , \*\* $p < 0.01$ , \*\*\* $p < 0.001$ .

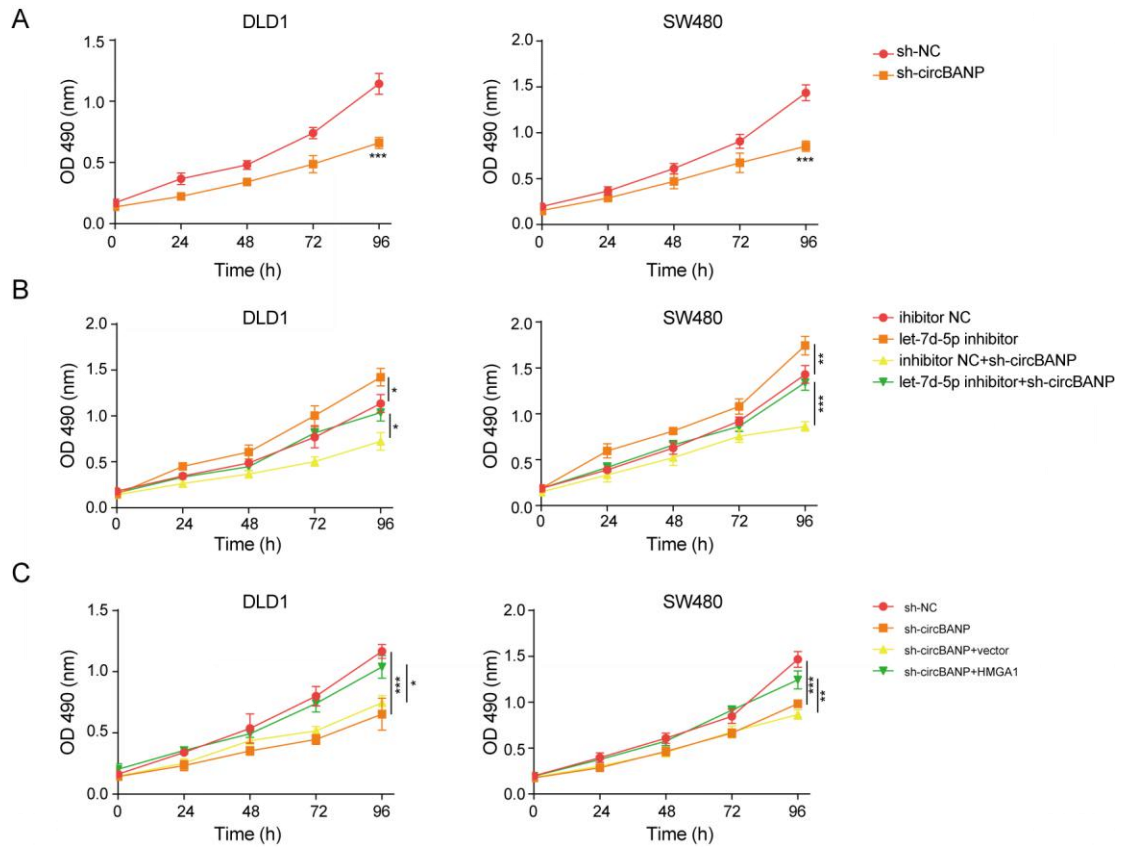

**Figure S2. CircBANP modulates cell viability via let-7d-5p/HMGA1 axis in CRC.**

(A) Cell viability was assessed in cells transfected with sh-circBANP. (B) Cell viability was measured in cells transfected with let-7d-5p inhibitor and/or sh-circBANP. (C) CCK8 analysis of viability in cells transfected with HMGA1 inhibitor and/or sh-circBANP. Data were presented as means  $\pm$  SD. \* $p < 0.05$ , \*\* $p < 0.01$ , \*\*\* $p < 0.001$ .
